# Supplementary material for: Clinical Impact of Tumor-Infiltrating Lymphocytes and PD-L1-Positive Cells as Prognostic and Predictive Biomarkers in Urological Malignancies and Retroperitoneal Sarcoma
Source: PubMed Central journal article supplement (PMC7692684; doi:10.3390/cancers12113153), 2020-10-27
Supplement: cancers-12-03153-s001.pdf [file cancers-12-03153-s001.pdf]

## Supplementary Materials:

# Clinical Impact of Tumor-Infiltrating Lymphocytes and PD-L1-Positive Cells as Prognostic and Predictive Biomarkers in Urological Malignancies and Retroperitoneal Sarcoma

Makito Miyake <sup>1,\*</sup>, Shunta Hori <sup>1</sup>, Takuya Owari <sup>1</sup>, Yuki Oda <sup>1</sup>, Yoshihiro Tatsumi <sup>1</sup>, Yasushi Nakai <sup>1</sup>, Tomomi Fujii <sup>2</sup> and Kiyohide Fujimoto <sup>1</sup>

**Table 1.** The patients' background used for immunohistochemical staining analysis.

| Primary Tumor Origin of Urothelial Carcinoma                               |    | Bladder    | Renal Pelvic | Ureter     |
|----------------------------------------------------------------------------|----|------------|--------------|------------|
| Total                                                                      |    | 58         | 75           | 54         |
| Age, years-old (median, range)                                             |    | 72 (52-86) | 67 (46-86)   | 70 (48-88) |
| Pathological T category (TNM Classification of Malignant Tumours, 8th ed.) |    |            |              |            |
|                                                                            | T1 | -          | 30 (40%)     | 23 (43%)   |
|                                                                            | T2 | 29 (50%)   | 10 (13%)     | 10 (19%)   |
|                                                                            | T3 | 17 (29%)   | 28 (37%)     | 17 (32%)   |
|                                                                            | T4 | 12 (21%)   | 7 (9%)       | 4 (7%)     |

**Table 2.** Primary and secondary antibodies used for immunohistochemical staining analysis.

| Antigen                                                                   | Provider                  | Catalogue Number | Clone    | Clonality         | Antigen Retrieval                                | Dilution Rate | Incubation Time | Incubation Temperature |
|---------------------------------------------------------------------------|---------------------------|------------------|----------|-------------------|--------------------------------------------------|---------------|-----------------|------------------------|
| CD3                                                                       | Santa Cruz                | sc-20047         | PC3/188A | Mouse monoclonal  | 10mM Citric Acid, pH 6.0<br>Autoclave for 20 min | 1:50          | Over night      | 4 °C                   |
| FOXP3                                                                     | Abcam                     | ab20034          | 236A/E7  | Mouse monoclonal  | 10mM Citric Acid, pH 6.0<br>Autoclave for 20 min | 1:100         | Over night      | 4 °C                   |
| CD204                                                                     | TransGenic                | KT022            | SRA-E5   | Mouse monoclonal  | 10mM Citric Acid, pH 6.0<br>Autoclave for 20 min | 1:2,000       | Over night      | 4 °C                   |
| PD-L1                                                                     | Cell Signaling Technology | 13684            | E1L3N    | Rabbit monoclonal | 10mM Citric Acid, pH 6.0<br>Autoclave for 20 min | 1:100         | Over night      | 4 °C                   |
| G-CSF                                                                     | IBL                       | #11041           | 4-12-2   | Mouse monoclonal  | 10mM Citric Acid, pH 6.0<br>Autoclave for 20 min | 1:50          | Over night      | 4 °C                   |
| GM-CSF                                                                    | Origene                   | PP1101P1         | NA       | Rabbit polyclonal | 10mM Citric Acid, pH 6.0<br>Autoclave for 20 min | 1:400         | Over night      | 4 °C                   |
| M-CSF                                                                     | Abcam                     | ab52864          | EP1179Y  | Rabbit polyclonal | 10mM Citric Acid, pH 6.0<br>Autoclave for 20 min | 1:500         | Over night      | 4 °C                   |
| Anti-mouse IgG and anti-rabbit IgG biotin-conjugated secondary antibodies | Nichirei Bioscience       | 426072           | -        | Goat polyclonal   | -                                                | ready-to-use  | 10 min          | Room temperature       |

PD-L1, program death ligand-1; G-CSF, granulocyte colony-stimulating factor; GM-CSF, granulocyte-macrophage colony-stimulating factor; M-CSF, macrophage colony-stimulating factor.; IgG, immunoglobulin G; NA, not available
